# Supplementary material
Source: HighWire-hosted journal article supplement (https://dmd.aspetjournals.org/highwire/filestream/78897/field_highwire_adjunct_files/0/799_Supp_data_v2.pdf)

**Target-Mediated Drug Disposition Affects the Pharmacokinetics of Interleukin-10**

**Fc-fusion Proteins at Pharmacologically Active Doses**

**Authors:** Zheng Yang, Surendran Rajendran, Vanessa Spires, Brian Poirson, Murali Gururajan, Zheng Lin, Jaren Arbanas, Stanley Krystek, James Loy, Yuan Cheng, Stephen Carl, Samantha Pace, Yun Wang, John Mehl, Shihua Xu, Krishna Vasudevan, Miranda Broz, Lois Lehman-McKeeman, Paul Morin, and Robert F. Graziano

**Affiliation:** Bristol Myers Squibb Company, Princeton, New Jersey, U.S.A.

**SUPPLEMENTAL MATERIALS AND REAGENTS**

**1. Structural Sequences of IL-10 and IL-10 Fc-fusion Proteins**

**mIL-10**

1 SRGQY SREDN NCTHF PVGQS HMLLE LRTAF SQVKT FFQTK  
41 DQLDN ILLTD SLMQD FKGYL GCQAL SEMIQ FYLVE VMPQA  
81 EKHGP EIKEH LNSLG EKLKT LRMRL RRCHR FLPCE NKSKA  
121 VEQVK SDFNK LQDQG VYKAM NEFDI FINCI EAYMM IKMKS

**hIL-10**

1 SRGQG TQSEN SCTHF PGNLP NMLRD LRDAF SRVKT FFQMK  
41 DQLDN LLLKE SLLED FKGYL GCQAL SEMIQ FYLEE VMPQA  
81 ENQDP DIKAH VNSLG ENLKT LRLRL RRCHR FLPCE NKSKA  
121 VEQVK NAFNK LQEKG IYKAM SEFDI FINYI EAYMT MKIRN

**mFc-mIL-10**

1 VPRDCGCKPC ICTVPEVSSV FIFPPKPKDV LTITLTPKVT CVVVAISKDD  
51 PEVQFSWFVD DVEVHTAQTQ PREEQFNSTF RSVSELPIMH QDWLNGKEFK  
101 CRVNSAAFPA PIEKTISKTK GRPKAPQVYT IPPPKEQMAK DKVSLTCMIT  
151 DFFPEDITVE WQWNGQPAEN YKNTQPIMDT DGSYFVYSKL NVQKSNWEAG  
201 NTFTCSVLHE GLHNHHTES LSHSPGGGGG SGGGGSGGGG SGGGGSSRGQ  
251 YSREDNNCTH FPVGQSHMLL ELRTAFSQVK TFFQTKDQLD NILLTDSLMO  
301 DFKGYLGCQA LSEMIQFYLV EVMPQAEKHG PEIKEHLNSL GEKLKTLRMR  
351 LRRCHRFLPC ENKSKAVEQV KSDFNKLQDQ GVKAMNEFD IFINCIEAYM  
401 MIKMKS

### **hFc-hIL-10**

1 DKTHTCPPCP APEAEGAPSV FLFPPKPKDT LMISRTPEVT CVVVDVSHED  
51 PEVKFNWYVD GVEVHNAKTK PREEQYNSTY RVVSVLTVLH QDWLNGKEYK  
101 CKVSNKALPA PIEKTISKAK GQPREPQVYT LPPSREEMTK NQVSLTCLVK  
151 GFYPSDIAVE WESNGQPENN YKTTTPVLDS DGSFFLYSKL TVDKSRWQQG  
201 NVFSCSVMHE ALHNHYTQKS LSLSPGGGGG SSGGGGSGGG GSGGGGSSPG  
251 QGTQSENSCT HFPGNLPNML RDLRDAFSRV KTFQMKDQL DNLLKESLL  
301 EDFKGYLGCQ ALSEMIQFYL EEVMPQAENQ DPDIKAHVNS LGENLKTLRL  
351 RLRRCHRFLP CENKSKAVEQ VKNAFNKLQE KGIYKAMSEF DIFINYIEAY  
401 MTMKIRN

### **hFc-hIL-10 mutant**

1 DKTHTCPPCP APEAEGAPSV FLFPPKPKDT LMISRTPEVT CVVVDVSHED  
51 PEVKFNWYVD GVEVHNAKTK PREEQYNSTY RVVSVLTVLH QDWLNGKEYK  
101 CKVSNKALPA PIEKTISKAK GQPREPQVYT LPPSREEMTK NQVSLTCLVK  
151 GFYPSDIAVE WESNGQPENN YKTTTPVLDS DGSFFLYSKL TVDKSRWQQG  
201 NVFSCSVMHE ALHNHYTQKS LSLSPGGGGG SSGGGGSGGG GSGGGGSSPG  
251 QGTQSENSCT HFPGNLPNML **S**DLRDAFSRV KTF**F**SMKDQL DN**S**LLKESLL  
301 EDFKGYLGCQ ALSEMIQFYL EEVMPQAENQ DPDIKAHVNS LGENLKTLRL  
351 RLRRCHRFLP CENKSKAVEQ VKNAFNKLQE KGIYKAMSEF DIFINYIEAY  
401 MTMKIRN

## **2. Characterizations of IL-10 and IL-10 Fc-fusion Proteins**

|                                         | <b>mIL-10</b> | <b>hIL-10</b> | <b>mFc-mIL-10</b> | <b>hFc-hIL-10</b> | <b>hFc-hIL-10 Mutant</b> |
|-----------------------------------------|---------------|---------------|-------------------|-------------------|--------------------------|
| <b>Molecular Weight (Da)*</b>           | 18,751        | 18,703        | 91,004            | 90,815            | 90,542                   |
| <b>Aggregation status</b>               |               |               |                   |                   |                          |
| <b>High molecular weight aggregates</b> | <5%           | <5%           | <5%               | <5%               | <5%                      |
| <b>Low molecular weight components</b>  | <5%           | <5%           | <5%               | <5%               | <5%                      |
| <b>Endotoxin (EU/mL)</b>                | <0.075        | <0.075        | <0.075            | <0.075            | <0.075                   |

\*Theoretical mass of deglycosylated form.

Primary structures of all five protein analytes (mIL-10, hIL-10, mFc-mIL-10, hFc-hIL10, and hFc-hIL-10 mutant) used in this publication were confirmed by LC/MS/MS peptide mapping with >97% sequence coverage. The molecular weights of the intact versions of these proteins verified by LC/MS were consistent with the theoretical masses calculated from the respective protein amino acid sequences.

**SUPPLEMENTAL TABLE**

**Supplemental Table 1. Key Models Tested and Fitting Performance for mFc-mIL-10 Pharmacokinetic Data after Intravenous and Intraperitoneal Administration to Tumor- and Non-tumor-bearing Mice**

| <b>Model</b>                                                                                | <b>Objective function<sup>a,b</sup></b> | <b>Akaike information criterion<sup>b</sup></b> | <b>Schwarz-Bayesian information criterion<sup>b</sup></b> |
|---------------------------------------------------------------------------------------------|-----------------------------------------|-------------------------------------------------|-----------------------------------------------------------|
| 1-compartment model with target- and non-target-mediated elimination                        | 839                                     | 869                                             | 897                                                       |
| 2-compartment model with target-mediated elimination only                                   | 839                                     | 870                                             | 900                                                       |
| 2-compartment model with target- and non-target-mediated elimination ( <b>final model</b> ) | 812                                     | 842                                             | 874                                                       |

a. Expressed as -2 times the log-likelihood function.

b. Converted from the output statistics in SAAM II.

**Supplemental Table 2. Key Models Tested and Fitting Performance for hFc-hIL-10 Pharmacokinetic Data after Intravenous Administration to Non-tumor-bearing Mice**

| <b>Model</b>                                                                                | <b>Objective function<sup>a,b</sup></b> | <b>Akaike information criterion<sup>b</sup></b> | <b>Schwarz-Bayesian information criterion<sup>b</sup></b> |
|---------------------------------------------------------------------------------------------|-----------------------------------------|-------------------------------------------------|-----------------------------------------------------------|
| 1-compartment model with target- and non-target-mediated elimination                        | 409                                     | 424                                             | 432                                                       |
| 2-compartment model with target-mediated elimination only                                   | 407                                     | 422                                             | 432                                                       |
| 2-compartment model with target- and non-target-mediated elimination ( <b>final model</b> ) | 357                                     | 375                                             | 387                                                       |

a. Expressed as -2 times the log-likelihood function.

b. Converted from the output statistics in SAAM II.

**Supplemental Table 3. Key Models Tested and Fitting Performance for mIL-10 Pharmacokinetic Data after Intravenous Administration to Non-tumor-bearing Mice**

| <b>Model</b>                                                                         | <b>Objective function<sup>a,b</sup></b> | <b>Akaike information criterion<sup>b</sup></b> | <b>Schwarz-Bayesian information criterion<sup>b</sup></b> |
|--------------------------------------------------------------------------------------|-----------------------------------------|-------------------------------------------------|-----------------------------------------------------------|
| 1-compartment model with non-target-mediated elimination only                        | 4,335                                   | 4,320                                           | 4,320                                                     |
| 2-compartment model with target- and non-target-mediated elimination <sup>c</sup>    | 404                                     | 414                                             | 421                                                       |
| 2-compartment model with non-target-mediated elimination only ( <b>final model</b> ) | 407                                     | 418                                             | 421                                                       |

a. Expressed as -2 times the log-likelihood function.

b. Converted from the output statistics in SAAM II.

c. The target binding affinity of mIL-10 was assumed to be the same as that (3.2 nM) of mFc-mIL-10 in mice.

**Supplemental Table 4. Key Models Tested and Fitting Performance for hIL-10 Pharmacokinetic Data after Intravenous Administration to Non-tumor-bearing Mice**

| <b>Model</b>                                                                         | <b>Objective function<sup>a,b</sup></b> | <b>Akaike information criterion<sup>b</sup></b> | <b>Schwarz-Bayesian information criterion<sup>b</sup></b> |
|--------------------------------------------------------------------------------------|-----------------------------------------|-------------------------------------------------|-----------------------------------------------------------|
| 1-compartment model with non-target-mediated elimination only                        | 2,490                                   | 2,492                                           | 2,492                                                     |
| 2-compartment model with target- and non-target-mediated elimination <sup>c</sup>    | 261                                     | 273                                             | 277                                                       |
| 2-compartment model with non-target-mediated elimination only ( <b>final model</b> ) | 280                                     | 290                                             | 294                                                       |

a. Expressed as -2 times the log-likelihood function.

b. Converted from the output statistics in SAAM II.

c. The target binding affinity of hIL-10 was assumed to be the same as that (2.9 nM) of hFc-hIL-10 in mice.

**SUPPLEMENTAL FIGURE**

**Supplemental Figure 1. Diagnostic Plots Obtained from Pharmacokinetic Modeling of mFc-mIL-10 Average Concentration Data after Intravenous and Intraperitoneal Administration to Tumor- and Non-tumor-bearing Mice**

a. Predicted vs. observed concentrations

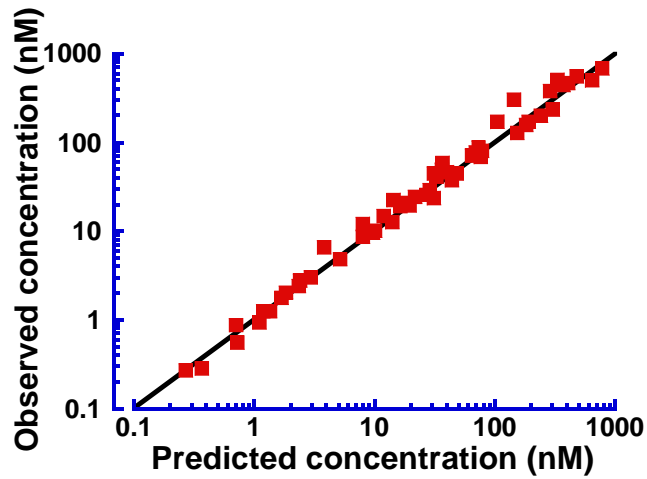

b. Weighted residuals vs. predicted concentrations

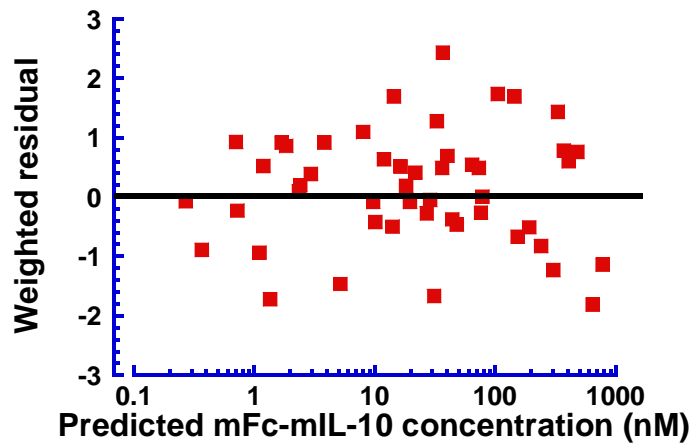

**Supplemental Figure 2. Diagnostic Plots Obtained from Pharmacokinetic Modeling of hFc-hIL-10 Average Concentration Data after Intravenous Administration to Non-tumor-bearing Mice**

a. Predicted vs. observed concentrations

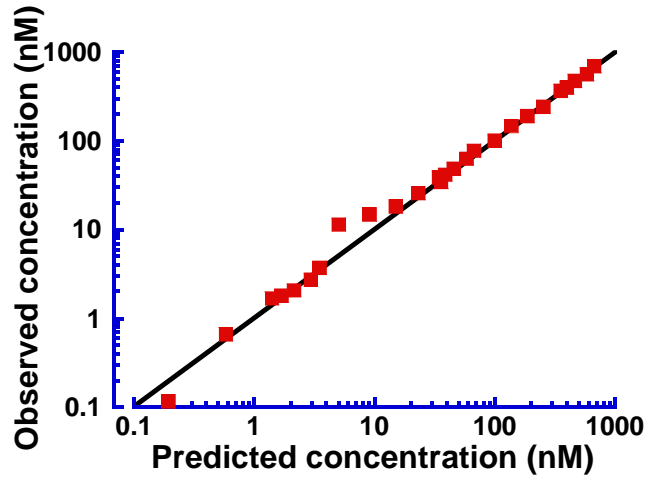

b. Weighted residuals vs. predicted concentrations

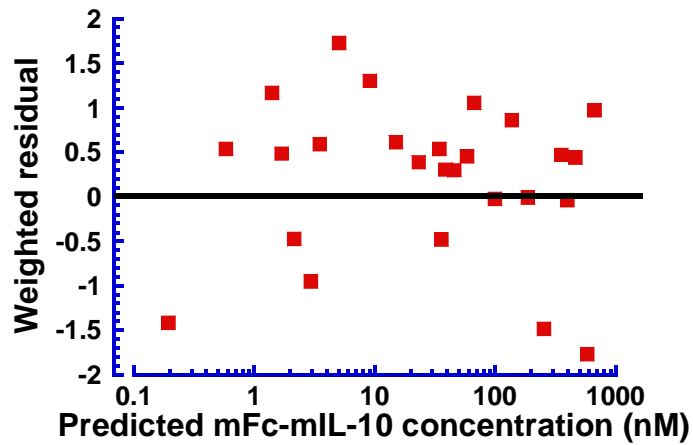

**Supplemental Figure 3. Diagnostic Plots Obtained from Pharmacokinetic Modeling of mIL-10 Average Concentration Data after Intravenous Administration to Non-tumor-bearing Mice**

a. Predicted vs. observed concentrations

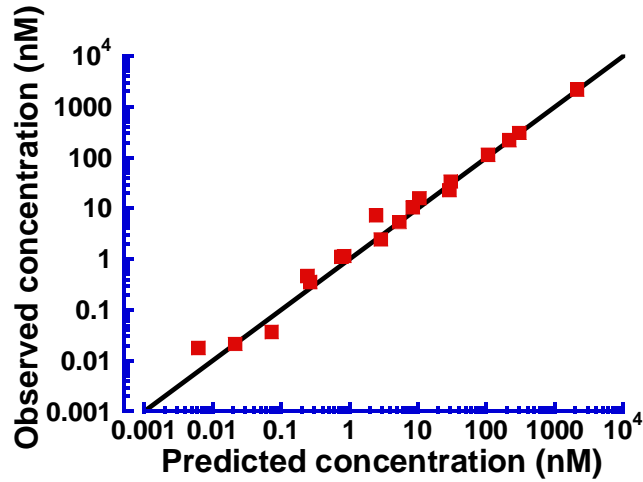

b. Weighted residuals vs. predicted concentrations

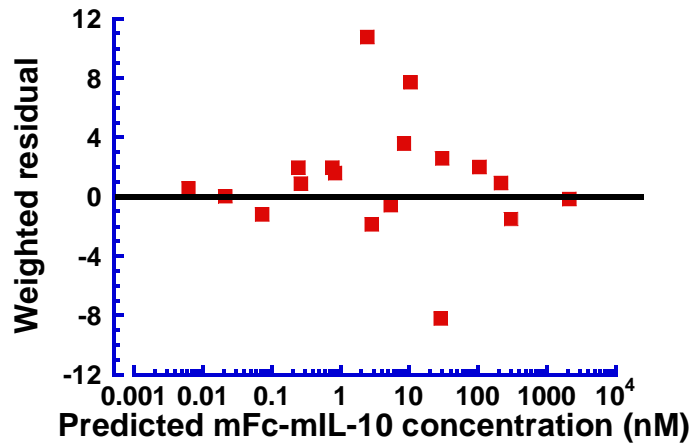

**Supplemental Figure 4. Diagnostic Plots Obtained from Pharmacokinetic Modeling of hIL-10 Average Concentration Data after Intravenous Administration to Non-tumor-bearing Mice**

a. Predicted vs. observed concentrations

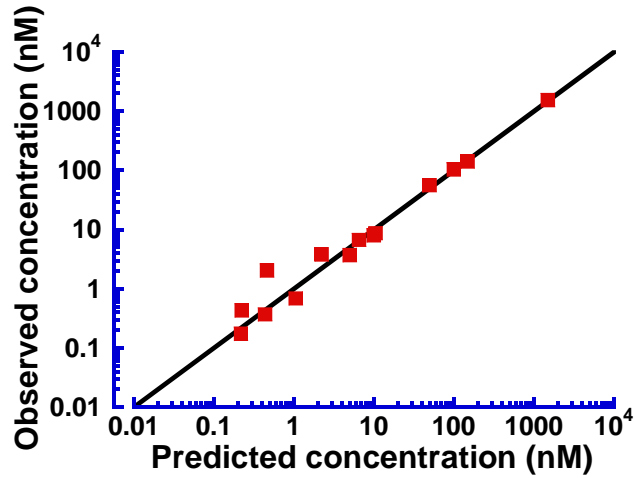

b. Weighted residuals vs. predicted concentrations

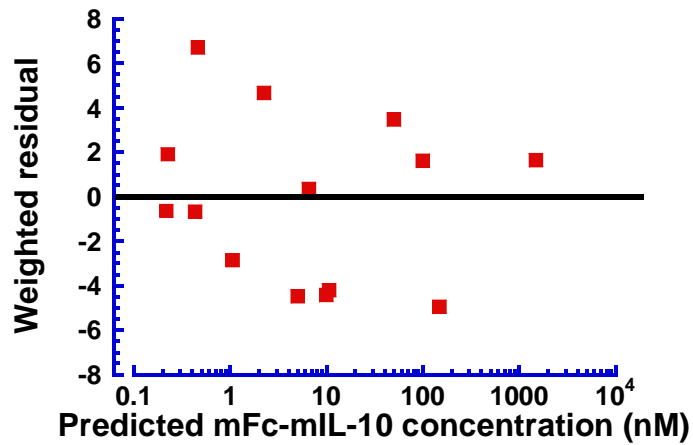



**Supplemental Figure 5. Time Course of Anti-mFc-mIL-10 Antibody Titers in the Mouse CT26 Syngeneic Tumor Model following Intraperitoneal Administration of mFc-mIL-10 and a Mouse Anti-mPD-1 Monoclonal Antibody**

(Note: mFc-mIL-10 was dosed weekly (QW) for 3 doses and the mouse anti-mPD-1 monoclonal antibody was given every 4 days (Q4D) for 6 doses. Anti-mFc-mIL-10 antibodies in mouse serum samples were detected by a ligand-binding assay on a chemiluminescence platform developed at Bristol Myers Squibb, with mFc-mIL-10 and peroxidase AffiniPure rat anti-mouse IgG (H+L) (Jackson ImmunoResearch Laboratories Inc., West Grove, PA) used as the capture and detection reagents, respectively. The line represents the average value of the data.)

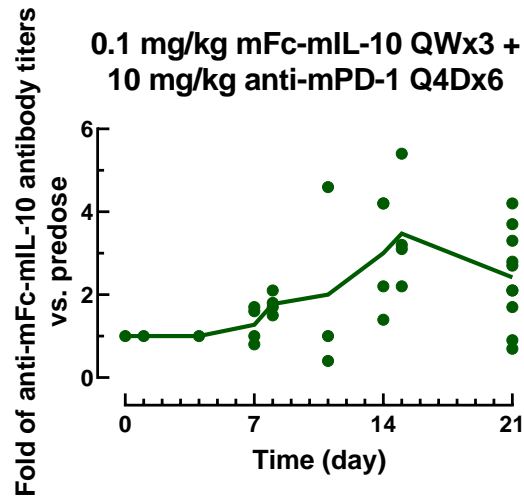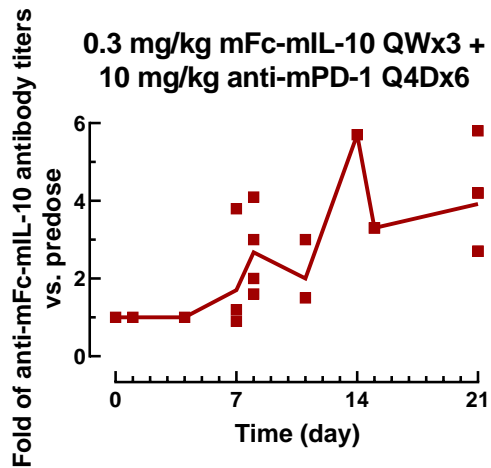

Supplement: 799_Supp_data_v2.pdf [file 799_Supp_data_v2.pdf]
